1 **Evaluation of 2022 Nursing Intake Forms from Massachusetts Jails: Content Analysis and Accuracy**  
2 **Assessment**

3 **Running Title: Jail Nursing Intake Forms**  
4

5 Emily D. Grussing BS Research Assistant <sup>1,2</sup> (Emily.grussing@tufts.edu); Bridget Pickard BA Research  
6 Assistant <sup>1</sup> (bridgetpickard@gmail.com); Emma Smyth BA <sup>1</sup> Research Assistant  
7 (emmasmyth33@gmail.com); Lauren Brinkley-Rubinstein PhD <sup>3</sup> Associate Professor  
8 (lauren\_brinkley@med.unc.edu); Alyse G. Wurcel MD <sup>1,2</sup> Associate Professor and Attending Physician  
9 (awurcel@tuftsmedicalcenter.org)

10 <sup>1</sup> Department of Medicine, Division of Geographic Medicine and Infectious Disease, Tufts Medical  
11 Center, Boston, MA USA

12 <sup>2</sup> Tufts University School of Medicine, Boston, MA USA

13 <sup>3</sup> Gillings School of Public Health, University of North Carolina at Chapel Hill, Chapel Hill, NC USA  
14

15 **Abstract:** The medical intake process is usually the first clinical interaction that people have after being  
16 incarcerated. In many states, the first vital person conducting this assessment is a nurse. In this project,  
17 nursing intake forms from Massachusetts jails were analyzed for the offer of 15 different screening and  
18 preventative services (e.g., HIV testing). Then, Health Services Administrators (HSAs) at the jails were  
19 asked to review and comment on the assessment. The average agreement rate between the project  
20 team members and HSAs was 73%. Twelve of the 14 jails had questions about history of HIV or HCV on  
21 the nursing intake form. Only 5 facilities discussed PrEP. There is potential to standardize the nursing  
22 intake form and therefore medical intake process. This must be done with key stakeholder groups, in  
23 particular nurses, to best understand the logistics of the complex medical intake process.

24 *Keywords:* HIV, hepatitis C virus, screening, jail healthcare  
25  
26  
27

## 28 **Introduction**

29 As the source of healthcare for over one million adults in the United States every year, the  
30 systems of healthcare delivery in jails should be routinely evaluated for areas of improvement (Carson,  
31 2022). Nurses and nurse-administrations are integral to and at the center of these healthcare systems.

32 People who are detained and incarcerated in criminal-legal settings face barriers to quality  
33 healthcare and have higher rates of infectious diseases, mental illness, and cardiovascular disease (Ahalt  
34 et al., 2013; Camplain et al., 2021; Dumont, 2013; Dumont et al., 2012; Freudenberg & Heller, 2016;  
35 Johnson et al., 2013; Massoglia et al., 2014). In order to facilitate continuity of care and offer  
36 preventative care, there is a medical intake process in most carceral settings where the person who is  
37 being detained interacts with a nurse or other member of the jail staff to review medical history, active  
38 medical treatments, and screen for psychiatric illness (Anno, 2001; Maner et al., 2022; Ndeffo-Mbah et  
39 al., 2018). This information is collected using a questionnaire, or medical intake form. Medical intake  
40 forms are completed almost universally across U.S. jails, prisons, and detention centers, although there  
41 is variability about who asks the questions and what questions are asked (Carda-Auten et al., 2022;  
42 Maner et al., 2022). Beyond asking about medical history, the CDC Infectious Diseases Corrections 2022  
43 guidelines recommend that medical intake form should include offering services, including evaluation  
44 for HIV, hepatitis, tuberculosis, gonorrhea, chlamydia, and syphilis (CDC, 2022b). The same guidelines  
45 also advise that vaccines and PrEP should be offered (CDC, 2022b).

46 In Massachusetts, the initial medical intake screening is always completed by a nurse, so this  
47 document is henceforth referred to as the nursing intake form for the purpose of this study. The same  
48 study team published an evaluation of 2018 nursing intake forms in Massachusetts and found  
49 heterogeneity in the infectious diseases questions asked during nursing intake (Wurcel et al., 2021).  
50 About 85% of jails asked about a history of HIV, but only 50% offered HIV testing (Wurcel et al., 2021).  
51 Half of the jails asked about previous HCV infection, and only 2 offered testing (Wurcel et al., 2021).

52 Since the study team's 2018 evaluation, the COVID19 pandemic brought increased attention to the  
53 process of COVID19 screening for people entering jail as well as offering COVID19 vaccination.

54 Prison and jail scholars interested in learning more about medical intake process have requested  
55 jail medical intake forms via the Freedom of Information Act (FOIA) (Yaremko, 2020). There is an  
56 increase in research reports analyzing the jail medical intake forms as a marker of healthcare. However,  
57 the accuracy of these content analyses has not been reviewed by the most critical jail employees: nurses  
58 and nurse-administrators.

### 59 **Objective**

60 The goal of this evaluation was to perform a content analysis on Massachusetts nursing intake forms  
61 from 2022. To complete the summative content analysis, researchers collected nursing intake forms and  
62 then had health services administrators (HSAs) from every jail support or refute the researchers'  
63 interpretation of data on the nursing intake forms, allowing researchers to revise findings if indicated.

### 64 **Methods**

65 **Setting:** Massachusetts has 14 counties and 15 jails. All the Massachusetts jails have  
66 accreditation from the American Correctional Association, the National Commission on Correctional  
67 Health Care, or both. The jails either have healthcare provided by the county, a for-profit medical  
68 organization, or a hybrid model. One county jail was excluded from this analysis due it is extremely small  
69 size and unique healthcare delivery system.

70 **Design:** This is a descriptive qualitative study design with summative content analysis.

71 **Sample:** The research team collected nursing intake forms from a convenience sample of  
72 fourteen jails in Massachusetts. HSAs are typically nurse-administrators who oversee the healthcare  
73 provided at jails. The nursing checklists were requested via email twice, and we followed up with one  
74 phone call.

75           **Research team checklist development:** The project team modified the previous evaluation  
76 research checklist on nursing intake from 2018 (Wurcel et al., 2021) to evaluate the nursing intake forms  
77 again in 2022 (Supplement 1). The modifications included surveying for the presence of questions on the  
78 intake form that addressed LGBTQIA+ status, offering COVID19 vaccination/history of vaccination,  
79 history of COVID19 infection, Sickle Cell disease, and offering STD testing. These modifications stemmed  
80 from an interest in taking a more holistic, updated view of infections and chronic diseases that affect  
81 infections that should be screened at intake. In particular, since the 2018 study, there have been  
82 initiatives in healthcare and jail settings to ask about LGBTQIA+ status (Bacak et al., 2018). Similar to  
83 previous projects, tuberculosis screening was not included in the assessment. The project team made  
84 this decision because tuberculosis screening in Massachusetts is universally implemented across jails in  
85 line with 2006 CDC recommendations and national accreditation requirements (CDC, 2006; NCCHC,  
86 2023).

87           **Research team content analysis:** Two Project teams members, BP and ES, analyzed nursing intake forms  
88 for items on the check list topics. The team members would answer “Yes,” “No,” or “Unsure.” Then two  
89 team members’ findings were compared, and any differing findings were resolved through repeat  
90 examination of the form and involvement of a third research team member to tie-break, if necessary.  
91 One hundred percent inter-rater reliability was achieved.

92           **Agreement check survey development:** Based on the results of the team members’ analysis (see  
93 research team survey development), a customized electronic survey was sent to each HSA at every  
94 facility with the findings of their facility’s nursing intake form. An example of a survey is included as a  
95 supplement (Supplement 2). The HSAs were asked to: (1) agree with the evaluation; or (2) disagree with  
96 the evaluation. If the HSA disagreed, they were asked to explain in a free text box why they disagreed  
97 with the findings.

98           **Expert review incorporation:** The research team recorded the responses given by the HSAs. If an  
99 HSA stated a topic was addressed, the research team would consider that topic as addressed during  
100 nursing intake. If an HSA stated a topic was not addressed, the research team would consider that topic  
101 as not addressed during intake. The research team would also record that that topic was changed from  
102 yes to no or no to yes after expert review by the HSA. The research team also collected the HSA's free  
103 text reasons for why they disagreed with the research team's content analysis findings.

104           **Ethics statement:** The collection of nursing intake forms was exempt as non-human subjects'  
105 research. The nursing intake forms collected for analysis were blank, so they contained no identifying  
106 information. The survey of the HSAs was granted as exempt from consent by the Tufts University Health  
107 Sciences Institutional Review Board (IRB).

## 108 **Results**

109           All 14 Massachusetts jails sent their nursing intake forms and responses to the surveys. The jails  
110 were anonymized as Jails A-N. Of note, two jails only completed page one of the survey (five questions).  
111 All other jails completed 15/15 questions. The results of the initial content analysis are displayed in  
112 Figure 1. Twelve of the 14 jails had questions about history of HIV or HCV on the nursing intake form.  
113 The least commonly covered topic was offering PrEP, with only five facilities discussing PrEP during  
114 nursing intake. The average agreement rate between the team members and HSAs was 73%. Free text  
115 responses fell into six broad categories: (1) topic is covered elsewhere during nursing intake  
116 (unspecified); (2) topic is covered elsewhere during nursing intake (specified); (3) topic is addressed by a  
117 broader question during nursing intake; (4) test is mandated for everyone, so not asked during nursing  
118 intake; (5) topic is addressed, but verbally; and (6) topic has been added since documents were shared  
119 with project team. These results can be found in Table 1. The most common reason for changing a  
120 response was that the topic is covered during an unspecified part of the nursing intake, with 12  
121 responses falling into this category.

122 **Discussion**

123           Although the nursing intake form may seem like a straightforward, accessible method for  
124 researchers, policy experts, and advocates to analyze the healthcare topics discussed during medical  
125 intake at jails, this study showed that the nursing intake form did not consistently reflect healthcare  
126 delivery. There are several reasons why this finding is an important addition to the literature. First,  
127 researchers, public health experts, and litigators may use nursing intake forms to evaluate the care  
128 provided at jails. Based on our analysis, the nursing intake forms do not capture all the types of  
129 healthcare services provided. Second, a goal of nursing intakes forms is to operationalize best practices  
130 so that the clinical evaluation can be equitable. Several jails reported that the infectious disease testing  
131 and vaccination was offered, just not at the time of nursing intake or on a separate form from the  
132 nursing intake form. The fragmentation of infectious diseases testing and vaccination into different  
133 systems and clinical interactions creates opportunities for heterogeneity in who gets offered or is able to  
134 access care. Third, despite being in a small state, there were differences in how jails incorporated  
135 infectious diseases testing and vaccination into the nursing intake form in Massachusetts. These  
136 differences could be exponentially greater in larger states.

137           The *Guidelines for the Management of an Adequate Delivery System* published by the National  
138 Commission of Correctional Health Care describes the medical intake process as the most important  
139 standard for correctional facilities to meet (Anno, 2001). The nursing intake form in Massachusetts is the  
140 first step in a multi-layered process of acute and chronic healthcare including organizing emergency  
141 triage; coordinating continuity of care; assessing current health status including mental and dental  
142 health; and offering a variety of optional preventative services (e.g., screenings and vaccination) (Anno,  
143 2001). The rate of deaths due to alcohol in United States jails doubled between 2001-2018 (Carson  
144 2021), and two-thirds of people who are incarcerated meet standards for substance use  
145 disorder/dependence (Bronson, 2017). The mental and physical status of a person who is newly

146 incarcerated may be impaired because of acute intoxication or withdrawal, leading to incorrect answers  
147 or answers to questions that may not represent their true wishes. Information about medical care does  
148 not pass easily from the jail to community or back (Butler, 2014). All of these factors complicate the  
149 process of working towards continuity of care for infectious diseases and providing the highest level of  
150 evidence-based interventions.

151           The creation of a universal infectious diseases intake form for jails that represents best practices  
152 is a feasible next step to encourage uniform application of best public health practices. Despite several  
153 obstacles, tuberculosis screening has been implemented across the U.S. in jails and prisons, with  
154 incredible impact in reduction of tuberculosis transmission both in the carceral setting and in the  
155 community (CDC, 2022a; Puisis et al., 1996; Saunders et al., 2001; Stewart et al., 2022). The creation of a  
156 universal infectious diseases medical intake form will require getting feedback from key stakeholders  
157 across the criminal-legal spectrum on the best time to ask questions, the way to ask questions, and the  
158 potential downstream consequences, such as increased medical costs, that need to be considered.

159           As the first people who meet and triage people who are incarcerated, nurses best understand  
160 the challenges of accessing accurate health information at intake into a carceral facility. Nurse-  
161 administrators understand the procedures for standardizing healthcare practices and assessing their  
162 efficacy. People who are incarcerated understand the lived experience of being detained and can  
163 provide expert first-hand feedback on the intake process, including what services they think they should  
164 be offered and what questions should be asked of and answered for them. As evidenced by this current  
165 review, there are lapses in questions asked and services offered during the intake process. The key to  
166 improving any care given during intake to a carceral facility is asking nurses and nurse-administrators on  
167 how to best do it.

168           Limitations of this report include focusing on a single state and getting feedback from only one  
169 person working at the jails. Due to the substantial differences that exist between state-run jails, a similar

170 analysis in a different state may yield different findings. Some states do not have intake forms asked by  
171 nurses, which may require investigators in other states to modify their assessment of the medical intake  
172 forms. This study was only conducted in jails, and the medical intake process in prisons may be different.  
173 It should be noted that two jails only completed five questions of our 15-question electronic survey. We  
174 believe this was because the survey was three pages long, with five questions per page, and  
175 respondents may have not seen the arrow at the bottom of the screen directing them to the rest of the  
176 survey. The survey questions sent to each facility were in a different order, so the 10 questions that  
177 were not answered were different for each facility. Therefore, the study team believes the missing  
178 questions did not greatly impact study results, as they only limited responses per question by one or two  
179 at most.

180 Despite these limitations, this work adds to the growing body of literature analyzing jail medical  
181 intake forms with goal of improving jail healthcare. It also highlights the shortcomings of these analyses.  
182 This work also calls for and outlines the potential process for standardizing the medical intake process,  
183 particularly by incorporating a consistent infectious diseases intake form, which would need to be  
184 developed with nursing feedback, which could help reduce disparity and promote best public health  
185 practices.

186

187

188

189

## References

190 Ahalt, C., Trestman, R. L., Rich, J. D., Greifinger, R. B., & Williams, B. A. (2013). Paying the price: the  
191 pressing need for quality, cost, and outcomes data to improve correctional health care for older  
192 prisoners. *J Am Geriatr Soc*, 61(11), 2013-2019. <https://doi.org/10.1111/jgs.12510>



- 193 Anno, B. J. (2001). *Guidelines for the Management of an Adequate Delivery System* (Vol. 2021). National  
194 Commission on Correctional Health Care.
- 195 Bacak, V., Thurman, K., Eyer, K., Qureshi, R., Bird, J. D. P., Rivera, L. M., & Kim, S. A. (2018). Incarceration  
196 as a Health Determinant for Sexual Orientation and Gender Minority Persons. *Am J Public*  
197 *Health, 108*(8), 994-999. <https://doi.org/10.2105/AJPH.2018.304500>
- 198 Bronson, J. S., Jessica. (2017). *Drug Use, Dependence, and Abuse Among State Prisoners and Jail Inmates,*  
199 *2007-2009* (Special Report, Issue. B. o. J. Statistics.  
200 <https://bjs.ojp.gov/content/pub/pdf/dudaspi0709.pdf>
- 201 Butler, B. (2014). Health information exchange between jails and their communities: a bridge that is  
202 needed under healthcare reform. *Perspect Health Inf Manag, 11*(Winter), 1b.  
203 <https://www.ncbi.nlm.nih.gov/pubmed/24808809>
- 204 Camplain, R., Lininger, M. R., Baldwin, J. A., & Trotter, R. T., 2nd. (2021). Cardiovascular Risk Factors  
205 among Individuals Incarcerated in an Arizona County Jail. *Int J Environ Res Public Health, 18*(13).  
206 <https://doi.org/10.3390/ijerph18137007>
- 207 Carda-Auten, J., Dirosa, E. A., Grodensky, C., Nowotny, K. M., Brinkley-Rubinstein, L., Travers, D., Brown,  
208 M., Bradley-Bull, S., Blue, C., & Rosen, D. L. (2022). Jail Health Care in the Southeastern United  
209 States From Entry to Release. *Milbank Q, 100*(3), 722-760. [https://doi.org/10.1111/1468-  
210 0009.12569](https://doi.org/10.1111/1468-0009.12569)
- 211 Carson, E. A. (2022). *Prisoners in 2021 – Statistical Tables*. U.S. Department of Justice. Retrieved April 20,  
212 2023 from chrome-  
213 extension://efaidnbmnnnibpajpcglclefindmkaj/[https://bjs.ojp.gov/sites/g/files/xyckuh236/files  
214 /media/document/p21st.pdf](https://bjs.ojp.gov/sites/g/files/xyckuh236/files/media/document/p21st.pdf)
- 215 CDC. (2006). *Slide Set — Tuberculosis (TB) in Correctional Settings: What Corrections Staff Need to Know*.  
216 Retrieved March 20 from chrome-  
217 extension://efaidnbmnnnibpajpcglclefindmkaj/[https://www.cdc.gov/tb/publications/slidesets/  
218 correctionalstaff/correctional-textonlyversion.pdf](https://www.cdc.gov/tb/publications/slidesets/correctionalstaff/correctional-textonlyversion.pdf)
- 219 CDC. (2022a). *Correctional Facilities*. CDC. Retrieved March 20, 2023 from  
220 <https://www.cdc.gov/tb/topic/populations/correctional/default.htm>
- 221 CDC. (2022b). *Testing, Vaccination, and Treatment for HIV, Viral Hepatitis, TB, and STIs* (Correction  
222 Health: Recommendations and Guidance, Issue. [https://www.cdc.gov/correctionalhealth/rec-  
223 guide.html](https://www.cdc.gov/correctionalhealth/rec-guide.html)
- 224 Dumont, D. M., Allen, S., Brockman, B., Alexander, N.E., Rich, J.D. . (2013). Incarceration, Community  
225 Health, and Racial Disparities. *Journal of Health Care for the Poor and Underserved, 21*, 78-88,  
226 Article 1. <https://doi.org/10.1353/hpu.2013.0000>
- 227 Dumont, D. M., Brockmann, B., Dickman, S., Alexander, N., & Rich, J. D. (2012). Public health and the  
228 epidemic of incarceration. *Annu Rev Public Health, 33*, 325-339.  
229 <https://doi.org/10.1146/annurev-publhealth-031811-124614>
- 230 Freudenberg, N., & Heller, D. (2016). A Review of Opportunities to Improve the Health of People  
231 Involved in the Criminal Justice System in the United States. *Annu Rev Public Health, 37*, 313-  
232 333. <https://doi.org/10.1146/annurev-publhealth-032315-021420>
- 233 Johnson, A. P., Macgowan, R. J., Eldridge, G. D., Morrow, K. M., Sosman, J., Zack, B., Margolis, A., &  
234 Project, S. S. G. (2013). Cost and threshold analysis of an HIV/STI/hepatitis prevention  
235 intervention for young men leaving prison: Project START. *AIDS Behav, 17*(8), 2676-2684.  
236 <https://doi.org/10.1007/s10461-011-0096-7>
- 237 Maner, M., Omori, M., Brinkley-Rubinstein, L., Beckwith, C. G., & Nowotny, K. (2022). Infectious disease  
238 surveillance in U.S. jails: Findings from a national survey. *PLoS One, 17*(8), e0272374.  
239 <https://doi.org/10.1371/journal.pone.0272374>

- 240 Massoglia, M., Pare, P. P., Schnittker, J., & Gagnon, A. (2014). The relationship between incarceration  
241 and premature adult mortality: gender specific evidence. *Soc Sci Res*, 46, 142-154.  
242 <https://doi.org/10.1016/j.ssresearch.2014.03.002>
- 243 NCCHC. (2023). *Health Assessment*. NCCHC. Retrieved March 20, 2023 from [https://www.ncchc.org/qa-](https://www.ncchc.org/qa/health-assessment/)  
244 [a/health-assessment/](https://www.ncchc.org/qa/health-assessment/)
- 245 Ndeffo-Mbah, M. L., Vigliotti, V. S., Skrip, L. A., Dolan, K., & Galvani, A. P. (2018). Dynamic Models of  
246 Infectious Disease Transmission in Prisons and the General Population. *Epidemiol Rev*, 40(1), 40-  
247 57. <https://doi.org/10.1093/epirev/mxx014>
- 248 Puisis, M., Feinglass, J., Lidow, E., & Mansour, M. (1996). Radiographic screening for tuberculosis in a  
249 large urban county jail. *Public Health Rep*, 111(4), 330-334.  
250 <https://www.ncbi.nlm.nih.gov/pubmed/8711100>
- 251 Saunders, D. L., Olive, D. M., Wallace, S. B., Lacy, D., Leyba, R., & Kendig, N. E. (2001). Tuberculosis  
252 screening in the federal prison system: an opportunity to treat and prevent tuberculosis in  
253 foreign-born populations. *Public Health Rep*, 116(3), 210-218.  
254 <https://doi.org/10.1093/phr/116.3.210>
- 255 Stewart, R. J., Raz, K. M., Burns, S. P., Kammerer, J. S., Haddad, M. B., Silk, B. J., & Wortham, J. M. (2022).  
256 Tuberculosis Outbreaks in State Prisons, United States, 2011-2019. *Am J Public Health*, 112(8),  
257 1170-1179. <https://doi.org/10.2105/AJPH.2022.306864>
- 258 Wurcel, A. G., Chen, G., Zubiago, J. A., Reyes, J., & Nowotny, K. M. (2021). Heterogeneity in Jail Nursing  
259 Medical Intake Forms: A Content Analysis. *J Correct Health Care*, 27(4), 265-271.  
260 <https://doi.org/10.1089/jchc.20.04.0018>
- 261 Yaremko, J. W., Kevin. (2020). Use of Freedom of Information Requests in Prison and Jail Studies. *Center*  
262 *for Access to Information and Justice*. chrome-  
263 extension://efaidnbmnnnibpajcglclefindmkaj/<https://www.uwinnipeg.ca/caij/docs/reports/us>  
264 [e-of-freedom-of-information-requests-in-prison-and-jail-studies.pdf](https://www.uwinnipeg.ca/caij/docs/reports/us)
- 265 Yehia, B. R., Schranz, A. J., Umscheid, C. A., & Lo Re, V., 3rd. (2014). The treatment cascade for chronic  
266 hepatitis C virus infection in the United States: a systematic review and meta-analysis. *PLoS One*,  
267 9(7), e101554. <https://doi.org/10.1371/journal.pone.0101554>

268

269

270

271

272

273

274

275

276 **Figure 1.** Responses by question

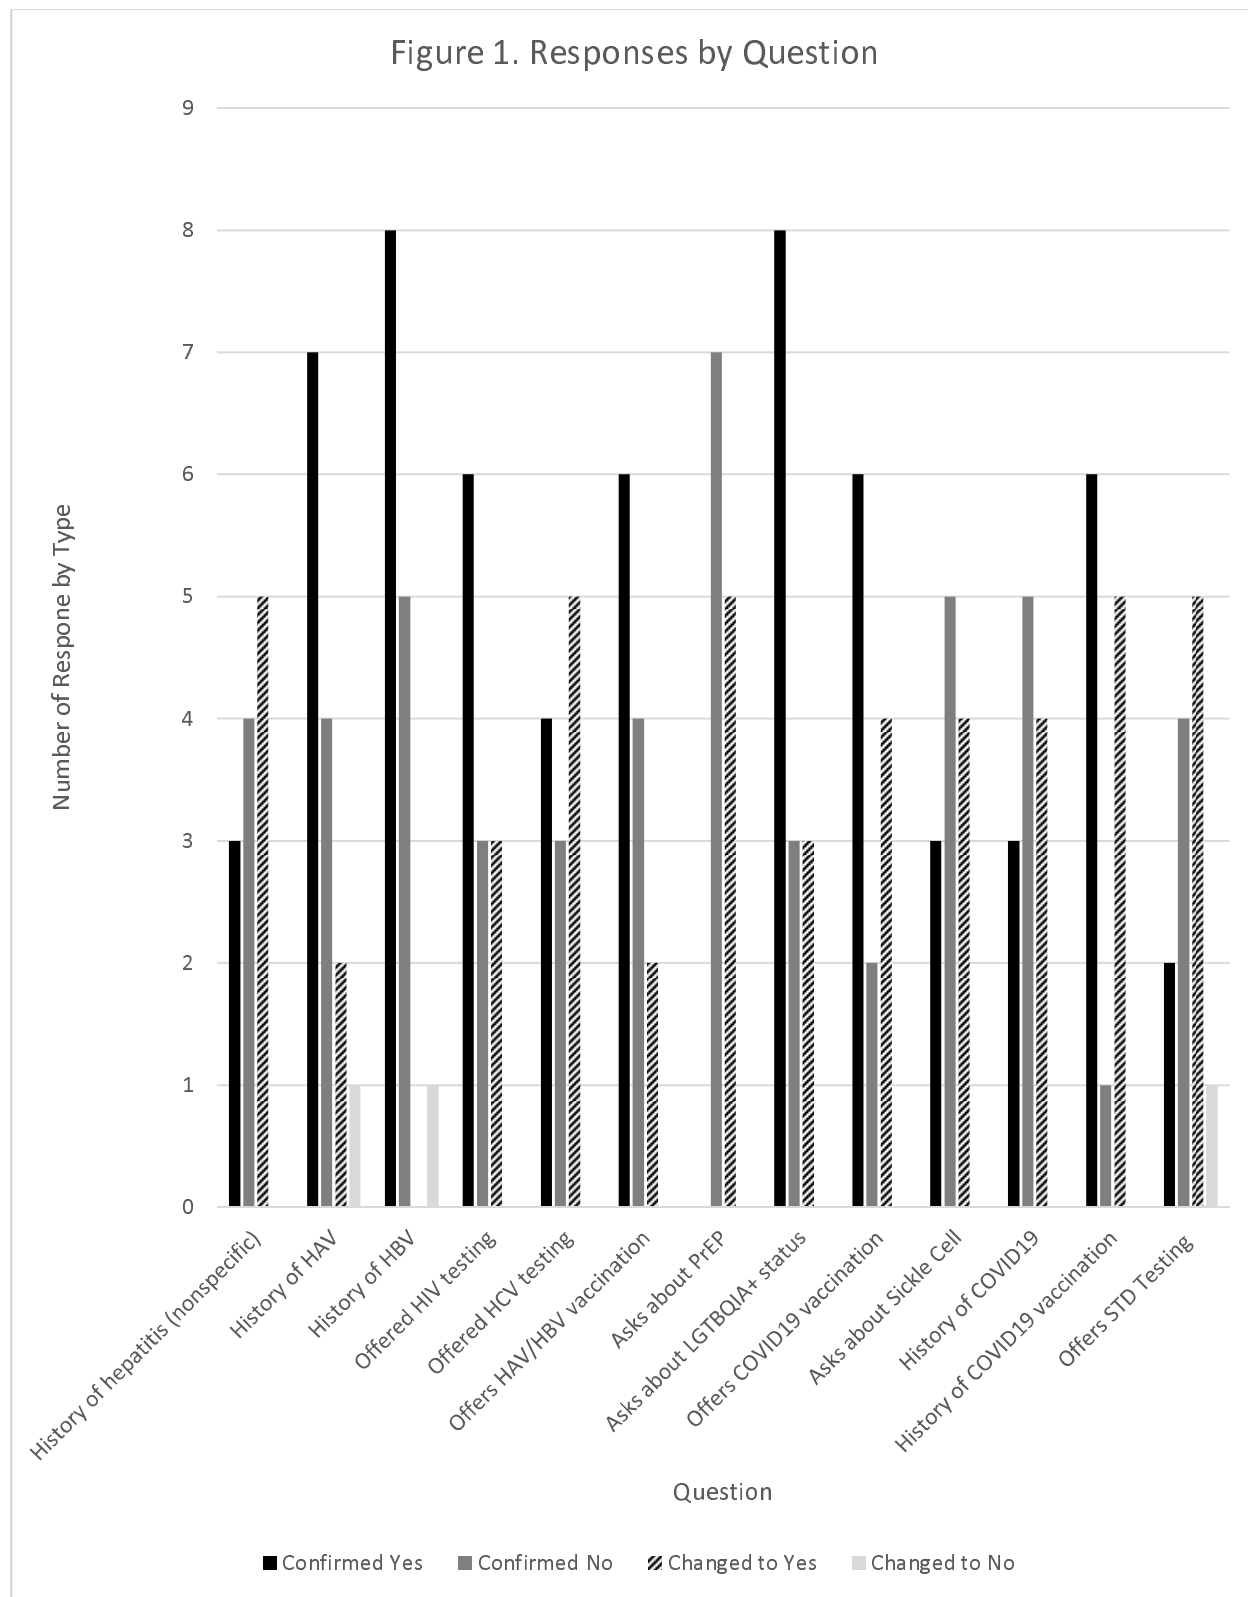

277

278 **Table 1.** Classification of Free Text Responses When HSA disagreed with Researcher Content Analysis

|                                                                |    |
|----------------------------------------------------------------|----|
| Topic is covered elsewhere during intake (unspecified)         | 12 |
| Topic is covered elsewhere during intake (specified)           | 10 |
| Topic is addressed by a broader question during nursing intake | 8  |
| Test is mandated for everyone, so not asked in nursing intake  | 3  |
| Topic is addressed, but verbally                               | 3  |
| Topic has been added since document was shared                 | 2  |

279

280

281

282

283
